# Supplementary material
Source: HighWire-hosted journal article supplement (https://erj.ersjournals.com/content/50/3/1602306)
Supplement: inline-supplementary-material-2 [file inline-supplementary-material-2.pdf]

| Table S1: Microbial aetiology in individual cohorts stratified according to CURB65 severity score |     |            |              |              |                     |
|---------------------------------------------------------------------------------------------------|-----|------------|--------------|--------------|---------------------|
| EDINBURGH COHORT                                                                                  |     |            |              |              |                     |
| CURB 65                                                                                           | N   | Mild (0-1) | Moderate (2) | Severe (3-5) | Risk ratio          |
| N                                                                                                 | 224 | 84         | 54 (138)     | 86           |                     |
| <i>S. pneumoniae</i>                                                                              | 107 | 32         | 30           | 45           | 1.16 (0.89 – 1.52)  |
| <i>H. influenza</i>                                                                               | 22  | 11         | 6            | 5            | 0.47 (0.18 – 1.23)  |
| MSSA                                                                                              | 18  | 7          | 3            | 8            | 1.28 (0.53 – 3.13)  |
| MRSA                                                                                              | 2   | 2          | 0            | 0            | 0.32 (0.016 – 6.58) |
| All Atypicals combined                                                                            | 22  | 13         | 4            | 5            | 0.47 (0.18 – 1.23)  |
| Gram negative <i>enterobacteriaceae</i>                                                           | 15  | 2          | 1            | 12           | 6.42 (2.86 – 22.10) |
| <i>P. aeruginosa</i>                                                                              | 2   | 1          | 1            | 0            | 1.28 (0.53 – 3.13)  |
| MDR pathogens combined                                                                            | 7   | 3          | 1            | 3            | 1.59 (0.33 – 7.71)  |
| MILAN COHORT                                                                                      |     |            |              |              |                     |
| CURB65                                                                                            |     | Mild (0-2) | Moderate (2) | Severe (3-5) | Risk ratio          |
| N                                                                                                 | 170 | 35         | 52 (87)      | 83           | -                   |
| <i>S.pneumoniae</i>                                                                               | 63  | 14         | 20           | 29           | 0.89 (0.60 – 1.33)  |
| <i>H.influenzae</i>                                                                               | 6   | 3          | 0            | 3            | 1.05 (0.22 – 5.05)  |
| MSSA                                                                                              | 21  | 0          | 3            | 18           | 6.3 (1.92 – 20.56)  |
| MRSA                                                                                              | 16  | 0          | 8            | 8            | 1.05 (0.41 – 2.66)  |
| All Atypicals combined                                                                            | 35  | 13         | 12           | 10           | 0.42 (0.21 – 0.82)  |
| Gram negative <i>enterobacteriaceae</i>                                                           | 30  | 2          | 10           | 18           | 1.57 (0.81 – 3.06)  |
| <i>Pseudomonas</i>                                                                                | 12  | 3          | 2            | 7            | 1.47 (0.48 – 4.44)  |
| MDR pathogens                                                                                     | 58  | 10         | 21           | 27           | 0.91 (0.60 – 1.39)  |
| FAILCAP COHORT                                                                                    |     |            |              |              |                     |
| CURB65                                                                                            |     | Mild (0-2) | Moderate (2) | Severe (3-5) | Risk ratio          |
| N                                                                                                 | 145 | 36         | 51 (87)      | 58           |                     |
| <i>S.pneumoniae</i>                                                                               | 54  | 11         | 20           | 23           | 1.11 (0.73 – 1.70)  |
| <i>H.influenzae</i>                                                                               | 3   | 2          | 0            | 1            | 0.30 (0.01 – 6.21)  |
| MSSA                                                                                              | 8   | 3          | 1            | 4            | 1.50 (0.39 – 5.76)  |
| MRSA                                                                                              | 12  | 1          | 5            | 6            | 1.50 (0.51 – 4.42)  |
| All Atypicals combined                                                                            | 29  | 11         | 13           | 5            | 0.32 (0.13 – 0.81)  |
| Gram negatives<br><i>enterobacteriaceae</i>                                                       | 13  | 2          | 4            | 7            | 1.75 (0.62 – 4.94)  |
| <i>Pseudomonas</i>                                                                                | 7   | 0          | 2            | 5            | 3.75 (0.75 – 18.68) |
| MDR pathogens                                                                                     | 18  | 3          | 5            | 10           | 1.88 (0.79 – 4.47)  |

| Table S2: Microbial aetiology in individual cohorts stratified according to the Pneumonia Severity Index |     |            |              |              |                           |
|----------------------------------------------------------------------------------------------------------|-----|------------|--------------|--------------|---------------------------|
| PSI                                                                                                      | n   | Mild (1-2) | Moderate (3) | Severe (4-5) | Risk ratio                |
| <b>EDINBURGH COHORT</b>                                                                                  |     |            |              |              |                           |
| N                                                                                                        | 224 | 69         | 44           | 111          |                           |
| <i>S. pneumoniae</i>                                                                                     | 107 | 26         | 21           | 60           | 1.30 (0.98 – 1.72)        |
| <i>H. influenzae</i>                                                                                     | 22  | 8          | 7            | 7            | 0.47 (0.20 – 1.12)        |
| MSSA                                                                                                     | 18  | 5          | 3            | 10           | 1.27 (0.52 – 3.11)        |
| MRSA                                                                                                     | 2   | 1          | 1            | 0            | 0.20 (0.0099 – 4.19)      |
| All Atypicals combined                                                                                   | 22  | 13         | 2            | 7            | 0.48 (0.20 – 1.12)        |
| Gram negative <i>enterobacteriaceae</i>                                                                  | 15  | 2          | 2            | 11           | 2.80 (0.92 – 8.53)        |
| <i>P. aeruginosa</i>                                                                                     | 2   | 0          | 0            | 2            | 5.09 (0.25 – 104.83)      |
| MDR pathogens combined                                                                                   | 7   | 1          | 2            | 4            | 1.35 (0.31 – 5.92)        |
| <b>MILAN COHORT</b>                                                                                      |     |            |              |              |                           |
| PSI                                                                                                      |     | Mild (1-2) | Moderate (3) | Severe (4-5) | Risk ratio                |
| N                                                                                                        | 170 | 16         | 16 (32)      | 138          |                           |
| <i>S.pneumoniae</i>                                                                                      | 63  | 5          | 5            | 53           | 1.22 (0.71 – 2.14)        |
| <i>H.influenzae</i>                                                                                      | 6   | 2          | 0            | 4            | 0.46 (0.089 – 2.42)       |
| MSSA                                                                                                     | 21  | 1          | 0            | 20           | 4.64 (0.65 – 33.3)        |
| MRSA                                                                                                     | 16  | 0          | 1            | 15           | 3.48 (0.48 – 25.38)       |
| All Atypicals combined                                                                                   | 35  | 8          | 7            | 20           | <b>0.31 (0.18 – 0.53)</b> |
| Gram negative <i>enterobacteriaceae</i>                                                                  | 30  | 1          | 2            | 27           | 3.03 (0.76 – 12.08)       |
| <i>Pseudomonas</i>                                                                                       | 12  | 0          | 1            | 11           | 2.55 (0.34 – 19.05)       |
| MDR pathogens                                                                                            | 58  | 2          | 5            | 51           | 1.69 (0.85 – 3.37)        |
| <b>FAILCAP COHORT</b>                                                                                    |     |            |              |              |                           |
| PSI                                                                                                      |     | Mild (1-2) | Moderate (3) | Severe (4-5) | Risk ratio                |
| N                                                                                                        | 145 | 24         | 14 (38)      | 107          |                           |
| <i>S.pneumoniae</i>                                                                                      | 54  | 8          | 6            | 40           | 1.01 (0.63 – 1.65)        |
| <i>H.influenzae</i>                                                                                      | 3   | 1          | 1            | 1            | 0.18 (0.017 – 1.90)       |
| MSSA                                                                                                     | 8   | 1          | 0            | 7            | 2.49 (0.32 – 19.55)       |
| MRSA                                                                                                     | 12  | 1          | 0            | 11           | 3.90 (0.52 – 29.26)       |
| All Atypicals combined                                                                                   | 29  | 10         | 3            | 16           | <b>0.44 (0.23 – 0.82)</b> |
| Gram negatives <i>enterobacteriaceae</i>                                                                 | 13  | 0          | 1            | 12           | 4.26 (0.57 – 31.68)       |
| <i>Pseudomonas</i>                                                                                       | 7   | 0          | 1            | 6            | 2.13 (0.27 – 17.13)       |
| MDR pathogens                                                                                            | 18  | 2          | 0            | 16           | 2.84 (0.68 -11.79)        |
| <b>BARCELONA COHORT n =665</b>                                                                           |     |            |              |              |                           |
| PSI                                                                                                      |     | 243        | 164          | 258          |                           |
| N                                                                                                        |     | 53         | 45           | 83           |                           |
| <i>S.pneumoniae</i>                                                                                      |     | 38         | 32           | 53           | 0.89 (0.73 – 1.10)        |
| <i>H.influenzae</i>                                                                                      |     | 1          | 2            | 2            | 0.79 (0.13 – 4.60)        |
| MSSA                                                                                                     |     | 1          | 0            | 0            | 0.39 (0.016 – 9.52)       |
| MRSA                                                                                                     |     | 3          | 2            | 5            | 1.18 (0.35 – 3.94)        |
| All Atypicals combined                                                                                   |     | 7          | 2            | 8            | 1.05 (0.42 – 2.60)        |
| Gram negatives <i>enterobacteriaceae</i>                                                                 |     | 3          | 2            | 5            | 1.18 (0.35 – 3.94)        |
| <i>Pseudomonas</i>                                                                                       |     | 1          | 5            | 7            | 1.38 (0.48 – 3.94)        |

|               |  |   |   |   |                    |
|---------------|--|---|---|---|--------------------|
| MDR pathogens |  | 3 | 2 | 7 | 1.65 (0.55 – 5.01) |
|---------------|--|---|---|---|--------------------|
